# Supplementary material
Source: PubMed Central journal article supplement (PMC5328166)
Supplement: ASN.2016050521SupplementaryData.pdf [file ASN.2016050521SupplementaryData.pdf]

**Supplementary Table 1S: Baseline characteristics for participants who withdrew from the study versus those who completed the study**

|                                                    | <b>Withdrew<br/>(n=10)</b> | <b>Completed<br/>(n=70)</b> |
|----------------------------------------------------|----------------------------|-----------------------------|
| <b>Age (years)</b>                                 | 61.2 ± 10.6                | 58.8 ± 10.7                 |
| <b>Gender (Male)</b>                               | 7 (70%)                    | 57 (81%)                    |
| <b>Race</b>                                        |                            |                             |
| Caucasian                                          | 7 (70%)                    | 52 (74%)                    |
| African American                                   | 2 (20%)                    | 12 (17%)                    |
| Other                                              | 1 (10%)                    | 6 (9%)                      |
| <b>Hispanic</b>                                    | 2 (20%)                    | 14 (20%)                    |
| <b>History of smoking (yes)</b>                    | 1 (10%)                    | 12 (17%)                    |
| <b>History of DM</b>                               | 5 (50%)                    | 43 (61%)                    |
| <b>History of CVD</b>                              | 5 (50%)                    | 32 (46%)                    |
| <b>BMI (kg/m<sup>2</sup>)</b>                      | 29.3 ± 4.8                 | 32.6 ± 5.2                  |
| <b>SBP (mmHg)</b>                                  | 135 ± 15                   | 127 ± 15                    |
| <b>DBP (mmHg)</b>                                  | 81.8 ± 6.8                 | 77.1 ± 9.7                  |
| <b>Hb A<sub>1c</sub> (%)</b>                       | 6.1 ± 0.9                  | 6.5 ± 1.7                   |
| <b>Triglycerides (mg/dL)</b>                       | 112 ± 50                   | 168 ± 170                   |
| <b>LDL-C (mg/dL)</b>                               | 80 ± 14                    | 82 ± 29                     |
| <b>HDL- C (mg/dL)</b>                              | 45.2 ± 19                  | 37.4 ± 10.4                 |
| <b>Creatinine (mg/dL)</b>                          | 1.59 ± 0.52                | 1.80 ± 0.38                 |
| <b>CKD-EPI eGFR<br/>(mL/min/1.73m<sup>2</sup>)</b> | 45.7 ± 13.4                | 41.6 ± 9.2                  |

|                                   |              |              |
|-----------------------------------|--------------|--------------|
| <b>ACR (mg/g)</b>                 | 296 ± 522    | 468 ± 622    |
| <b>Serum urate levels (mg/dL)</b> | 8.1 ± 1.4    | 8.5 ± 1.4    |
| <b>BA-FMD (% Δ)</b>               | 6.4 ± 4.1    | 5.3 ± 5.1    |
| <b>NMD (% Δ)</b>                  | 21.4 ± 12.0  | 18.7 ± 9.5   |
| <b>Baseline CRP (mg/L)</b>        | 5.5 ± 4.4    | 4.3 ± 5.5    |
| <b>IL-6 (pg/mL)</b>               | 15.1 ± 31.4  | 2.7 ± 2.6    |
| <b>MCP-1 (pg/mL)</b>              | 127.5 ± 20.8 | 164.1 ± 61.9 |
| <b>Ox-LDL (U/L)</b>               | 47.7 ± 8.3   | 47.4 ± 13.6  |
